# Supplementary material for: V2O5, CeO2 and Their MWCNTs Nanocomposites Modified for the Removal of Kerosene from Water
Source: MDPI journal article supplement (doi:10.3390/nano12020189), 2022-01-06
Supplement: s1 [file s1]

**Table S1:** Spectral analysis data from the deconvolution of D- and G-bands and the calculated ratios. Ratio changes compared to the MWCNTs sample are displayed in brackets.

| Sample           | Center | FWHM   | Area        | Intensity | I <sub>D</sub> /I <sub>G</sub> | I <sub>D</sub> /I <sub>G'</sub> | I <sub>G'</sub> /I <sub>D</sub> | A <sub>D</sub> /A <sub>G</sub> | A <sub>D</sub> /A <sub>G</sub> | A <sub>G</sub> /A <sub>D</sub> |
|------------------|--------|--------|-------------|-----------|--------------------------------|---------------------------------|---------------------------------|--------------------------------|--------------------------------|--------------------------------|
| MWCNTs           | 1284   | 71.130 | 0.0472<br>2 | 0.001782  | 1.48                           | 1.84                            | 0.54                            | 1.59                           | 1.05                           | 0.96                           |
|                  | 1289   | 36.760 | 0.0588<br>7 |           |                                |                                 |                                 |                                |                                |                                |
|                  | 1598   | 36.995 | 0.0668<br>4 | 0.001207  |                                |                                 |                                 |                                |                                |                                |
|                  | 2561   | 71.375 | 0.1015<br>0 | 0.000862  |                                |                                 |                                 |                                |                                |                                |
| MWCNTs<br>ox.    | 1289   | 43.178 | 0.0676<br>6 | 0.001419  | 1.44<br>(-0.04)                | 1.65<br>(-0.19)                 | 0.61<br>(0.06)                  | 1.48<br>(-0.11)                | 0.97<br>(-0.08)                | 1.03<br>(0.08)                 |
|                  | 1289   | 59.332 | 0.0308<br>9 |           |                                |                                 |                                 |                                |                                |                                |
|                  | 1599   | 44.993 | 0.0665<br>1 | 0.000988  |                                |                                 |                                 |                                |                                |                                |
|                  | 2567   | 76.308 | 0.1017<br>6 | 0.000862  |                                |                                 |                                 |                                |                                |                                |
| Ce/MWCNTs        | 1289   | 67.900 | 0.0623<br>7 | 0.002172  | 1.60<br>(0.12)                 | 2.74<br>(0.89)                  | 0.37<br>(-0.18)                 | 1.76<br>(0.17)                 | 2.44<br>(1.39)                 | 0.41<br>(-0.55)                |
|                  | 1289   | 40.887 | 0.0777<br>4 |           |                                |                                 |                                 |                                |                                |                                |
|                  | 1599   | 47.349 | 0.0796<br>2 | 0.001361  |                                |                                 |                                 |                                |                                |                                |
|                  | 2567   | 59.131 | 0.0574<br>8 | 0.000794  |                                |                                 |                                 |                                |                                |                                |
| V/MWCNTs         | 1289   | 73.096 | 0.0487<br>6 | 0.001454  | 1.40<br>(-0.08)                | 2.30<br>(0.46)                  | 0.43<br>(-0.11)                 | 1.40<br>(-0.18)                | 2.08<br>(1.03)                 | 0.48<br>(-0.48)                |
|                  | 1289   | 55.547 | 0.0799<br>3 |           |                                |                                 |                                 |                                |                                |                                |
|                  | 1600   | 57.770 | 0.0917<br>8 | 0.001041  |                                |                                 |                                 |                                |                                |                                |
|                  | 2561   | 67.739 | 0.0620<br>0 | 0.000632  |                                |                                 |                                 |                                |                                |                                |
| CV:Ce/<br>MWCNTs | 1289   | 64.762 | 0.0684<br>5 | 0.002304  | 1.78<br>(0.31)                 | 2.65<br>(0.81)                  | 0.38<br>(-0.17)                 | 2.42<br>(0.84)                 | 2.24<br>(1.19)                 | 0.45<br>(-0.51)                |
|                  | 1289   | 42.833 | 0.0933<br>8 |           |                                |                                 |                                 |                                |                                |                                |

|  |      |        |             |          |  |  |  |  |  |  |
|--|------|--------|-------------|----------|--|--|--|--|--|--|
|  | 1598 | 45.096 | 0.0668<br>0 | 0.001291 |  |  |  |  |  |  |
|  | 2566 | 60.566 | 0.0723<br>7 | 0.000868 |  |  |  |  |  |  |

**Table S2:** Mass loss data from the termoanalytical measurements

| Sample     | T start<br>(°C) | T end<br>(°C) | Mass loss step   | Total<br>mass<br>loss | Residual<br>mass     | Estimated Ce-<br>/V-oxide<br>content<br>(m/m%) |
|------------|-----------------|---------------|------------------|-----------------------|----------------------|------------------------------------------------|
| MWCNTs     | 21              | 190           | 0.15 mg (2.5 %)  | 5.28 mg<br>(89.6 %)   | 0.614 mg<br>(10.4 %) | n/a                                            |
|            | 190             | 440           | 0.05 mg (0.8 %)  |                       |                      |                                                |
|            | 440             | 750           | 5.08 mg (86.2 %) |                       |                      |                                                |
|            | 750             | 1016          | 0 mg (0 %)       |                       |                      |                                                |
| MWCNTs ox. | 21              | 155           | 1.43 mg (20.1 %) | 7.02 mg<br>(98.5 %)   | 0.108 mg<br>(1.5 %)  | n/a                                            |
|            | 155             | 366           | 1.32 mg (18.5 %) |                       |                      |                                                |
|            | 366             | 500           | 0.32 mg (4.5 %)  |                       |                      |                                                |
|            | 500             | 730           | 3.84 mg (53.9 %) |                       |                      |                                                |
|            | 730             | 1016          | 0.11 mg (1.5 %)  |                       |                      |                                                |
| Ce/MWCNTs  | 22              | 190           | 0.35 mg (5.1 %)  | 6.04 mg<br>(86.6 %)   | 0.938 mg<br>(13.4 %) | CeO <sub>2</sub> : 11.9%                       |
|            | 190             | 360           | 0.33 mg (4.7 %)  |                       |                      |                                                |
|            | 360             | 485           | 0.49 mg (7 %)    |                       |                      |                                                |
|            | 485             | 700           | 4.86 mg (69.6 %) |                       |                      |                                                |

|             |     |      |                  |                     |                      |                                                           |
|-------------|-----|------|------------------|---------------------|----------------------|-----------------------------------------------------------|
|             | 700 | 1015 | 0.01 mg (0.2 %)  |                     |                      |                                                           |
| V/MWCNTs    | 22  | 190  | 0.58 mg (8.4 %)  | 6.6 mg<br>(94.8 %)  | 0.364 mg<br>(5.2 %)  | V <sub>2</sub> O <sub>5</sub> : 3.7%                      |
|             | 190 | 330  | 0.4 mg (5.7 %)   |                     |                      |                                                           |
|             | 330 | 418  | 0.88 mg (12.6 %) |                     |                      |                                                           |
|             | 418 | 590  | 4.59 mg (65.8 %) |                     |                      |                                                           |
|             | 590 | 700  | 0.15 mg (2.1 %)  |                     |                      |                                                           |
|             | 700 | 1015 | 0.01 mg (0.2 %)  |                     |                      |                                                           |
| V:Ce/MWCNTs | 21  | 190  | 0.52 mg (7.4 %)  | 6.21 mg<br>(90.0 %) | 0.694 mg<br>(10.0 %) | CeO <sub>2</sub> +V <sub>2</sub> O <sub>5</sub> :<br>8.5% |
|             | 190 | 316  | 0.25 mg (3.6 %)  |                     |                      |                                                           |
|             | 316 | 422  | 1.02 mg (14.6 %) |                     |                      |                                                           |
|             | 422 | 545  | 3.42 mg (49.1 %) |                     |                      |                                                           |
|             | 545 | 700  | 1.01 mg (14.6 %) |                     |                      |                                                           |
|             | 700 | 1016 | 0.06 mg (0.8 %)  |                     |                      |                                                           |

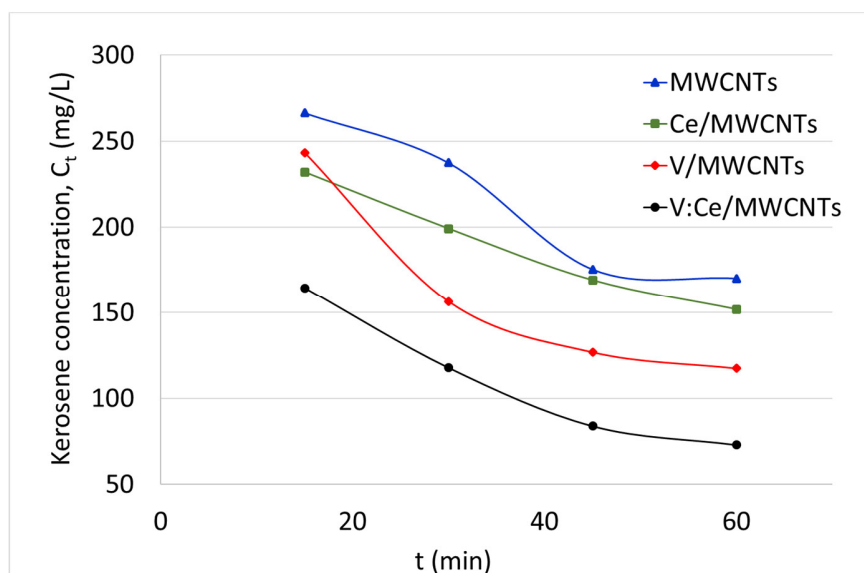

**Figure S1.** Change in kerosene concentration against time over MWCNTs, Ce/MWCNTs, V/MWCNTs and V:Ce/MWCNTs ( $C_0 = 500$  mg,  $V_{\text{sample}} = 0.05$  L,  $m_{\text{ads}} = 0.005$  g).

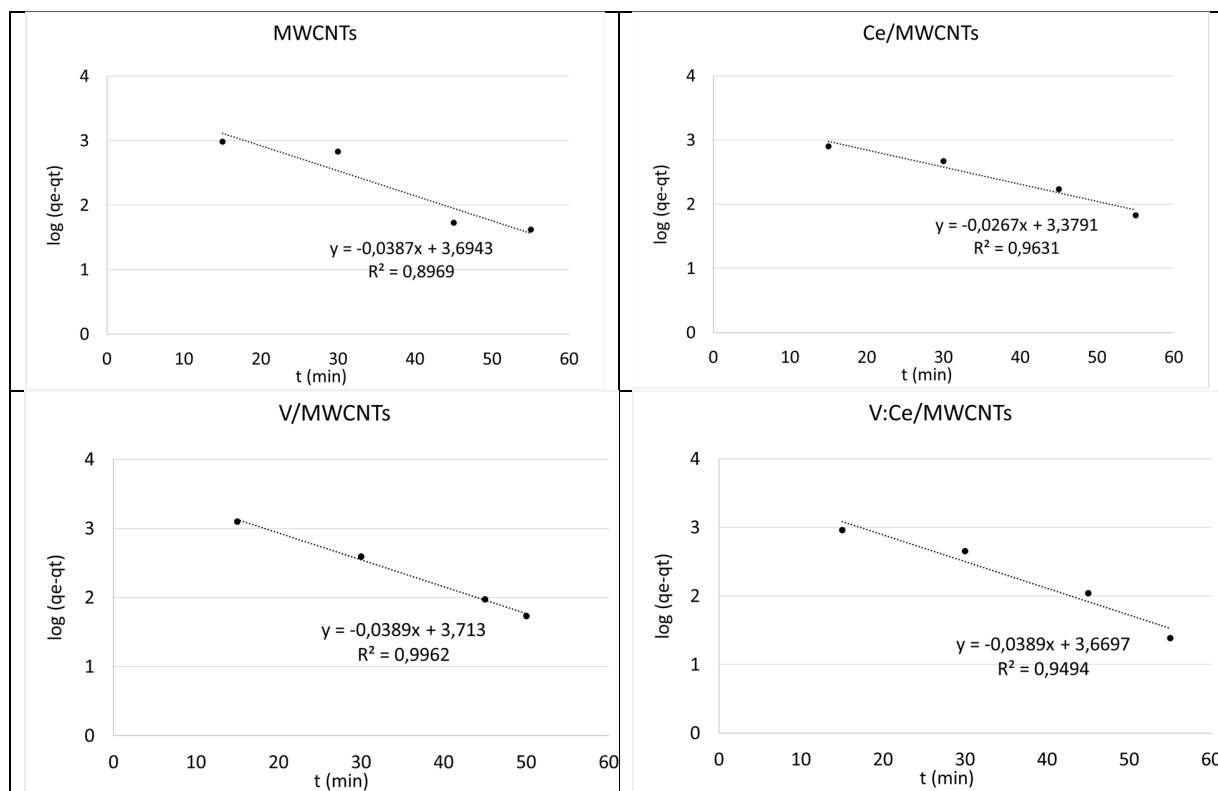

**Figure S2.** Pseudo-first order plot for kerosene adsorption onto metal oxide-modified MWCNTs.
